# Supplementary material for: Antifibrogenic Effects of the Antimicrobial Peptide Cathelicidin in Murine Colitis-Associated Fibrosis
Source: PubMed Central journal article supplement — Cell Mol Gastroenterol Hepatol. 2014 Nov 11;1(1):55–74.e1. doi: 10.1016/j.jcmgh.2014.08.001 (PMC4338438; doi:10.1016/j.jcmgh.2014.08.001), 2014-11-11
Supplement: NIHMS646758-supplement-01.pdf [file NIHMS646758-supplement-01.pdf]

## **Supplementary Figure**

### **Cathelicidin did not affect cell proliferation in colonic tissues.**

Immunofluorescence staining of cell proliferation marker PCNA (red), fibroblast marker vimentin (green) and nuclei DAPI (blue). In TNBS+TFA, weak red PCNA staining was observed in and around fibroblasts that were identified by green color. Overlapping images of red PCNA staining, green vimentin staining and blue nuclear staining are shown in lower right corner. All groups had low level of PCNA staining in and around vimentin green staining, indicating low cell proliferation in colonic fibroblasts.

Supplementary Figure

TNBS +  
TFA

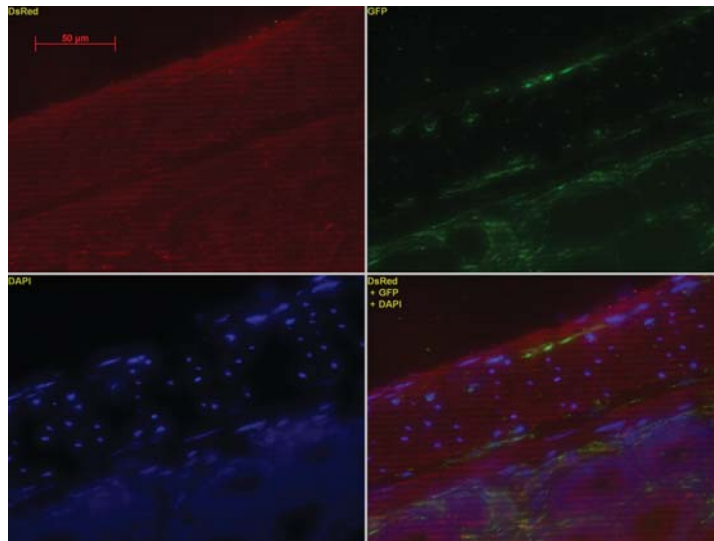

TNBS +  
mCRAMP

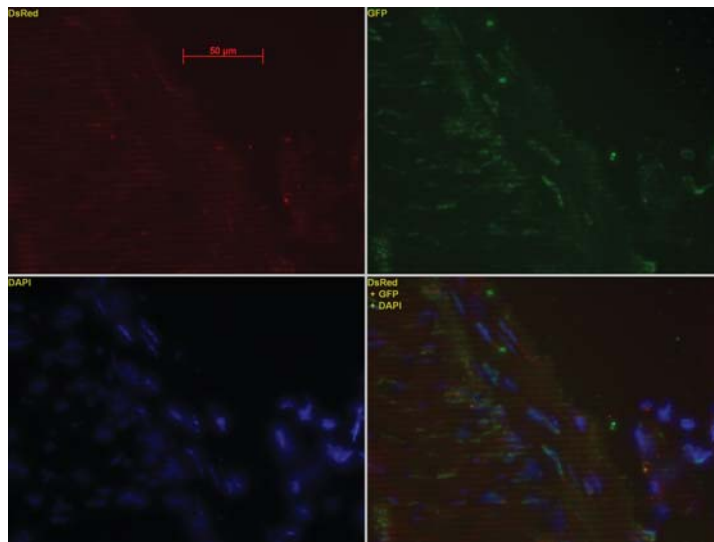

Ethanol control

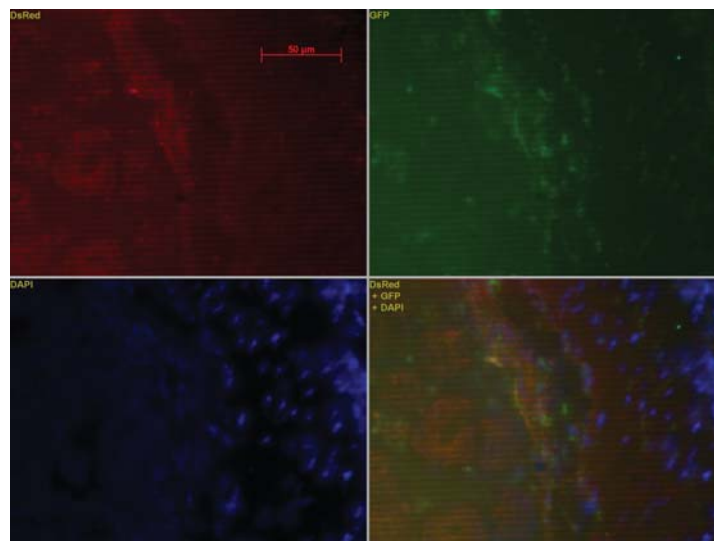

Immunofluorescence staining 400X  
Texas red- PCNA  
FITC green - Vimentin  
DAPI blue - nuclei
